# Supplementary material for: Application of machine learning techniques for creating urban microbial fingerprints
Source: Biol Direct. 2019 Aug 16;14:13. doi: 10.1186/s13062-019-0245-x (PMC6697990; doi:10.1186/s13062-019-0245-x)
Supplement: Supplementary file 7 — Table S4. Importance table generated by Random Forest showing mean decrease in accuracy and mean disease in Gini associated with each feature in the random forest model. (XLSX 65 kb) [file 13062_2019_245_MOESM7_ESM.xlsx]

## Sheet: Importance table
	MeanDecreaseAccuracy	MeanDecreaseGini
Campylobacter_jejuni_subsp._jejuni	0.0228361	3.98414
Staphylococcus_argenteus	0.015241	2.3731
Fusobacterium_necrophorum_subsp._funduliforme	0.0124105	2.45869
Tolypothrichaceae	0.0101759	1.97201
Wallemia_mellicola_CBS_633.66	0.0093783	1.79576
Terrisporobacter_othiniensis	0.00909451	1.75914
Bovine_parvovirus_3	0.00904536	1.82129
Atopobium_vaginae	0.00883696	1.85711
Synechocystis_sp._PCC_7509	0.008496	1.32587
Aureobasidium_pullulans	0.0078382	1.01061
Tolypothrix_sp._NIES-4075	0.00777315	1.26632
Aureobasidium_pullulans_EXF-150	0.00738818	1.02754
Aspergillus_cristatus	0.00726092	1.52016
Aspergillus	0.00691304	1.26553
Rachicladosporium	0.00683235	1.20384
Pleurocapsa_sp._PCC_7319	0.00645777	1.04648
Aureobasidium	0.0064573	1.10531
Aliterella_atlantica	0.00554521	0.873768
Epicoccum_nigrum	0.00552604	1.15411
Rachicladosporium_antarcticum	0.00528264	0.964372
Pleosporomycetidae	0.00511127	1.22822
Aspergillus_versicolor_CBS_583.65	0.0050732	1.24749
Dothideomycetes	0.00499437	0.779543
Aspergillus_glaucus_CBS_516.65	0.00488187	1.24191
Pleosporales	0.00479563	1.085
Nostoc_flagelliforme	0.00468077	0.743696
Aspergillaceae	0.00459947	0.732507
Pseudomonas_stutzeri_group	0.0045233	0.767114
Kineococcus_radiotolerans	0.00436997	1.15128
Exophiala	0.00421874	0.799696
Penicillium_digitatum	0.00419306	0.786777
Rufibacter	0.00398263	0.809773
Zymoseptoria	0.0039643	0.698248
Acidomyces_richmondensis	0.00385512	0.964528
Pezizomycotina	0.00381862	0.75049
Hanseniaspora_uvarum	0.00381246	0.712989
Corynebacterium_variabile	0.00379829	1.00626
Rachicladosporium_sp._CCFEE_5018	0.00378705	0.69889
Cyphellophora_europaea_CBS_101466	0.00364375	0.684946
Calocera_viscosa_TUFC12733	0.00357331	0.49746
Fungi	0.00353919	0.789566
Rufibacter_sp._DG15C	0.00350354	0.858404
Aureobasidium_namibiae_CBS_147.97	0.00344524	0.518762
Calothrix	0.00343445	0.676408
Erythroparvovirus	0.00338753	0.611336
Pseudomonas_sp._TTU2014-066ASC	0.00332309	0.755128
Clavibacter	0.00330264	1.02639
Modestobacter_sp._DSM_44400	0.00329582	1.101
Pseudomonas_balearica	0.00323248	0.628099
Calothrix_sp._HK-06	0.00321745	0.647865
Babesia	0.00318146	0.488035
Luteococcus_japonicus	0.00318107	0.755975
Bocaparvovirus	0.00317576	0.698177
Chipmunk_parvovirus	0.0031724	0.603881
Parvovirinae	0.00315166	0.784124
Didymellaceae	0.00307566	0.776016
Zasmidium_cellare	0.00302333	0.414421
Exidia_glandulosa_HHB12029	0.0029857	0.44416
Sphingomonas_sp._URHD0057	0.00298258	0.54188
Winogradskyella_sp._PC-19	0.00297141	0.862389
Chaetothyriomycetidae	0.00297091	0.398423
Sphingomonas_sp._Leaf343	0.00294755	0.529488
Thecamonas_trahens_ATCC_50062	0.00294427	0.35139
Geodermatophilaceae_bacterium_URHB0062	0.00293684	0.890172
Hymenobacter_norwichensis	0.00292631	0.63443
Xanthomonas_phage_OP2	0.0029134	0.510774
Dothistroma_septosporum_NZE10	0.00287847	0.645816
Franconibacter_helveticus	0.00286729	0.732928
Rickettsiella_grylli	0.00286531	0.973111
Bipolaris_maydis	0.00285834	0.562084
Chlorophyta	0.00284124	0.526691
Stemphylium_lycopersici	0.00283626	0.770289
Geodermatophilaceae_bacterium_URHB0048	0.00279481	0.714708
Rufibacter_tibetensis	0.00278573	0.87071
Hortaea_werneckii_EXF-2000	0.00272248	0.468762
Nostocales	0.00269802	0.550241
Pontibacter	0.00266023	0.649682
Chroococcales_cyanobacterium_IPPAS_B-1203	0.00263582	0.57294
Geodermatophilaceae_bacterium_URHA0031	0.00262081	0.70127
Capnodiales	0.00260714	0.464438
Nostoc	0.00256299	0.472306
Paracoccus_sp._228	0.00254705	0.893232
Kocuria_sp._WN036	0.00250916	0.499175
Hymenobacter_gelipurpurascens	0.00249848	0.592571
Roseomonas_aerilata	0.00249482	0.70593
Propionibacteriaceae	0.00243355	0.65494
Arcobacter_thereius	0.00242797	0.413504
Calothrix_sp._PCC_7103	0.00241591	0.593461
Pseudomonas_stutzeri	0.0024069	0.482152
Botryosphaeriaceae	0.00237245	0.451048
Ramularia_collo-cygni	0.00236177	0.404242
Tremellales	0.0023233	0.569325
Sanguibacter_antarcticus	0.0023016	0.569244
Clavibacter_michiganensis	0.00229782	0.557278
Sedimentibacter_sp._B4	0.00228234	0.405947
Acidipropionibacterium_jensenii	0.00226724	0.595123
Allomyces_macrogynus_ATCC_38327	0.00225195	0.320615
Ustilago_hordei	0.00224773	0.495113
Geodermatophilus	0.0022319	0.613896
Calothrix_sp._NIES-4101	0.0022317	0.466268
Sporidiobolus_salmonicolor	0.00221602	0.33491
Mycetocola_miduiensis	0.00218031	0.367529
Atlantibacter_hermannii	0.00214435	0.511168
Baudoinia_panamericana_UAMH_10762	0.00213374	0.334644
Campylobacter_jejuni	0.00213228	0.324232
Roseomonas	0.00212285	0.508935
Tremellomycetes	0.0020904	0.44919
Dacryopinax_primogenitus	0.00208215	0.197095
Calothrix_elsteri	0.00205853	0.423442
Kocuria_polaris	0.00204397	0.525976
Pseudocercospora_musae	0.0020284	0.480623
Pseudomonas_coleopterorum	0.00200766	0.444064
Pseudomonas_stutzeri_DSM_10701	0.00199463	0.373039
Staphylococcaceae	0.00198649	0.315116
Friedmanniella	0.00198577	0.581225
Fusobacterium_nucleatum	0.00198448	0.389296
Babesia_ovata	0.00198421	0.520687
Rufibacter_sp._DG31D	0.00198073	0.550181
Botrytis_cinerea_B05.10	0.00196985	0.352537
Skermanella_aerolata	0.00196665	0.633064
Salpingoecidae	0.001952	0.157715
Geodermatophilus_amargosae	0.001948	0.553371
Acidipropionibacterium_thoenii	0.00194731	0.618889
Cystoisospora_suis	0.00194443	0.31732
Hymenobacter_sp._PAMC_26554	0.00193226	0.378182
Stagonospora_sp._SRC1lsM3a	0.00192792	0.595912
Franconibacter	0.00190243	0.455406
Kocuria_sp._UCD-OTCP	0.00189406	0.513529
Clostridium_sp._C105KSO15	0.0018896	0.404327
Debaryomyces_hansenii_CBS767	0.00188593	0.29264
leotiomyceta	0.00187865	0.350572
Franconibacter_pulveris	0.00187291	0.456764
Fusobacterium_necrophorum	0.00186247	0.369559
sordariomyceta	0.00186073	0.601318
Geodermatophilus_nigrescens	0.00185368	0.451071
Tessaracoccus	0.00182395	0.418062
Parabacteroides_goldsteinii	0.00180834	0.463813
Blastococcus_sp._DSM_44272	0.00180395	0.411492
Tessaracoccus_sp._NSG39	0.00179598	0.49899
Dothideomycetidae	0.00179516	0.3443
Pig-tailed_macaque_parvovirus	0.00179434	0.436799
Trichococcus_flocculiformis	0.0017538	0.390381
Rathayibacter	0.0017519	0.415082
Pseudomonas_rhizosphaerae	0.00174792	0.398297
Tessaracoccus_bendigoensis	0.00174669	0.625646
Lysinibacillus_xylanilyticus	0.00172261	0.484916
Pleosporaceae	0.00171207	0.334399
Pseudescherichia_vulneris	0.00171159	0.598548
Mobilicoccus_pelagius	0.00170469	0.30285
Knoellia_aerolata	0.00170398	0.554939
Bacillus_sp._7504-2	0.00170076	0.470305
Pseudomonas_phage_EL	0.00168935	0.381239
Leuconostoc	0.00168522	0.4267
Cyanothece_sp._PCC_7822	0.00168447	0.323207
Eurotiomycetes	0.00165637	0.33387
Gemmatirosa_kalamazoonesis	0.00164556	0.353105
Pleosporineae	0.00163857	0.371114
Tannerella_forsythia	0.00162057	0.260745
Skermanella_stibiiresistens	0.00161567	0.312421
Acidipropionibacterium	0.00161242	0.347682
Pseudomonadales_bacterium_GWC2_63_15	0.00161068	0.36532
Nostoc_linckia	0.00160015	0.422749
Arthrobacter_agilis	0.00159869	0.336367
Geodermatophilus_sabuli	0.00159322	0.401141
Dermacoccus	0.0015851	0.700702
Rummeliibacillus_stabekisii	0.00157799	0.367897
Corynebacterium_xerosis	0.0015773	0.380975
Coniosporium_apollinis_CBS_100218	0.00157675	0.388405
Pseudocercospora	0.00157341	0.340322
Lysinibacillus	0.00155938	0.37491
Glonium_stellatum	0.00155012	0.195268
Acidobacteria_bacterium_OLB17	0.00154971	0.182092
Penicilliopsis_zonata_CBS_506.65	0.00154097	0.262848
Modestobacter_sp._VKM_Ac-2676	0.00153623	0.402561
Arthrobacter_sp._RIT-PI-e	0.0015341	0.260119
Didymella_pinodes	0.00152323	0.207271
Neofusicoccum_parvum_UCRNP2	0.00152123	0.501846
Lachnospiraceae	0.00150751	0.420347
Parastagonospora_nodorum_SN15	0.00150199	0.291446
Cercospora_beticola	0.00150013	0.247727
Sphingomonas_sp._Leaf412	0.00146473	0.156947
Kocuria_indica	0.00146379	0.411228
Romboutsia_timonensis	0.00145323	0.364614
Crinalium_epipsammum	0.00144873	0.318837
Pseudovibrio_sp._Ad37	0.00144372	0.429261
Clostridium_sulfidigenes	0.00143562	0.420806
Neisseria_subflava_NJ9703	0.00141244	0.408972
Tremella_fuciformis	0.00140836	0.406621
Glutamicibacter_arilaitensis	0.00140664	0.516691
Friedmanniella_luteola	0.00140445	0.427556
Talaromyces_islandicus	0.00140431	0.3049
Nostoc_sp._'Peltigera_membranacea_cyanobiont'_210A	0.00140317	0.316037
Blastococcus_endophyticus	0.00140025	0.318993
Pucciniales	0.00139708	0.246073
Clostridium_sp._KNHs209	0.00139508	0.512787
Flavobacterium_soli	0.00138581	0.440723
Modestobacter_marinus	0.00137655	0.336393
Pseudomonas_sp._RIT-PI-a	0.0013755	0.436972
Lysinibacillus_sp._FJAT-14745	0.00136735	0.377457
Pseudarthrobacter_phenanthrenivorans	0.00134182	0.370604
Dikarya	0.00133978	0.240191
Puccinia_graminis_f._sp._tritici_CRL_75-36-700-3	0.00133646	0.19216
Anaerocolumna_xylanovorans	0.00133166	0.553711
Trichococcus	0.00133125	0.315508
Hymenobacter_coccineus	0.00132464	0.290626
Nocardioides_exalbidus	0.00131491	0.341361
Exophiala_xenobiotica	0.00131364	0.266433
Arsenicicoccus	0.00131358	0.287754
Modestobacter	0.00130487	0.37701
Zymoseptoria_tritici	0.00129861	0.262759
Pseudomonas_sp._TTU2014-096BSC	0.00129645	0.261337
Chaetothyriales	0.00129024	0.394754
Arsenicicoccus_bolidensis	0.00128872	0.294527
Blastococcus_sp._DSM_44205	0.00128203	0.319056
Geodermatophilaceae	0.0012819	0.394799
Plasmodium_berghei	0.00127184	0.217726
Corynebacterium	0.00126768	0.34628
Brochothrix_thermosphacta	0.00125582	0.266446
Chondrocystis_sp._NIES-4102	0.00124859	0.332633
Belnapia_rosea	0.00124102	0.230716
Roseomonas_rosea	0.00123618	0.293896
Agaricomycetes_incertae_sedis	0.00123011	0.273722
Cavenderia_fasciculata	0.00122758	0.206151
Byssochlamys_spectabilis_No._5	0.0012232	0.232554
Dorea	0.00121982	0.277301
Xylona_heveae_TC161	0.00120836	0.231752
Weissella_confusa	0.00120743	0.38478
Leptosphaeria_maculans_JN3	0.00119628	0.0623886
Rhodotorula_graminis_WP1	0.00118834	0.266539
Lachnoclostridium_phytofermentans	0.00117542	0.459588
Exophiala_mesophila	0.00117225	0.155756
Belnapia	0.00116211	0.238833
Lachnospiraceae_bacterium_Marseille-P3773	0.00115905	0.408253
Acidomyces_richmondensis_BFW	0.00114906	0.213401
Kocuria_marina	0.00114355	0.274327
Belnapia_moabensis	0.00113827	0.179269
Hymenobacter_sp._PAMC_26628	0.00113759	0.313163
Kocuria_sp._ICS0012	0.00113718	0.335091
Zymoseptoria_brevis	0.00113594	0.296456
Anaerocolumna_aminovalerica	0.00111902	0.311998
Cryptococcus_gattii_species_complex	0.00111813	0.370588
Pseudomonas_sp._K35	0.00111679	0.402087
Lawsonella_clevelandensis	0.00111132	0.216782
Onygenales	0.00110426	0.238264
Blastococcus_sp._URHD0036	0.00110075	0.246773
Lepidopterella_palustris_CBS_459.81	0.00109821	0.240095
Tessaracoccus_massiliensis	0.00109774	0.39002
Erysiphe_necator	0.00109363	0.201427
Pseudomonas_lundensis	0.0010934	0.212678
Cutibacterium_acnes	0.0010933	0.217668
Pyrenophora	0.00109224	0.181081
Blastococcus_sp._DSM_46838	0.00108067	0.234238
Candida_parapsilosis	0.00108043	0.0972701
Anaerosporobacter_mobilis	0.00108011	0.280177
Pseudomonas_stutzeri_subgroup	0.00107411	0.480087
Oscillatoria_nigro-viridis	0.00107381	0.215738
Desnuesiella_massiliensis	0.00107236	0.349334
Friedmanniella_flava	0.00106305	0.325447
Finegoldia_magna	0.00105259	0.159214
Agrococcus	0.00104966	0.30206
Propionibacterium_freudenreichii	0.00104816	0.404493
Aureobasidium_melanogenum_CBS_110374	0.00104741	0.288175
Kocuria_sp._SM24M-10	0.00103979	0.310654
Geodermatophilus_obscurus	0.00103814	0.323667
Lysinibacillus_sp._AR18-8	0.0010275	0.314672
Kocuria_rhizophila	0.00102618	0.205159
Brachybacterium_nesterenkovii	0.0010241	0.325449
Mycobacterium_iranicum	0.00102129	0.406835
Pseudocercospora_fijiensis_CIRAD86	0.00102084	0.189585
bacterium_MS4	0.00102083	0.328325
Clostridium_sp._BL8	0.00101853	0.324174
Bacillus_nealsonii	0.001018	0.335373
Lactobacillus_sakei	0.0010177	0.166156
Cellulomonas_cellasea	0.00101163	0.260961
Ustilaginaceae	0.00101149	0.186088
Pedobacter_agri	0.00100943	0.113333
Propionibacterium_acnes_JCM_18918	0.00100311	0.156168
Mycobacterium_abscessus	0.00100204	0.192145
Planctopirus_sp._JC280	0.000988834	0.115275
Trebouxia_aggregata	0.000987572	0.11845
Cronobacter	0.00097855	0.27687
Achromobacter_arsenitoxydans	0.000978347	0.269375
Pseudomonas_sp._BICA1-14	0.000969657	0.3098
Streptococcus_sanguinis	0.000968996	0.123283
Bacillus_circulans	0.00096847	0.280063
Eubacterium	0.000966654	0.222736
Umbilicaria_pustulata	0.00096562	0.115034
Psychrobacter_sp._SHUES1	0.000958145	0.24782
Phialophora_attae	0.000957992	0.234122
Friedmanniella_sagamiharensis	0.000953198	0.261215
Lachnospiraceae_bacterium_28-4	0.000949716	0.305701
Actinobacteria_bacterium_HGW-Actinobacteria-5	0.000943676	0.275882
Arthrobacter_sp._L77	0.000943179	0.225202
Cellulomonas	0.000936327	0.186908
Propionibacterium_acnes_JCM_18909	0.000933641	0.158894
Neisseria_polysaccharea	0.000926745	0.140172
Corynebacterium_kroppenstedtii	0.000921697	0.154937
Enterococcus_italicus	0.000921264	0.244749
Tessaracoccus_flavus	0.00092126	0.254512
Kocuria_flava	0.000918743	0.277633
Arthrobacter_sp._OY3WO11	0.000917969	0.288849
Kwoniella_pini_CBS_10737	0.000916695	0.228454
Listeria_monocytogenes_SHL006	0.000916387	0.107482
Cellulomonas_sp._KH9	0.000912412	0.275733
Geodermatophilus_sp._DSM_45219	0.000908951	0.273295
Cryptococcus_depauperatus	0.000906124	0.243281
Mycosphaerella_eumusae	0.000905983	0.161564
Corynebacterium_callunae	0.000902052	0.264893
Nosocomiicoccus	0.000901955	0.300248
Tulasnella_calospora_MUT_4182	0.000901879	0.15883
Clostridium_sp._KNHs205	0.000898977	0.200667
Malassezia_pachydermatis	0.00089642	0.0705307
Chryseobacterium_solincola	0.000893593	0.317938
Azospirillum_oryzae	0.00089007	0.225956
Brevibacterium_casei	0.000888614	0.226154
Arthrobacter_sp._Leaf137	0.000887286	0.467592
Clostridiales_bacterium_oral_taxon_876	0.000886466	0.384629
Pseudomonas_syringae	0.000882047	0.135295
Rhodoplanes_sp._Z2-YC6860	0.000877176	0.110697
Armillaria_ostoyae	0.000875378	0.216432
Exophiala_oligosperma	0.000874131	0.197431
Sanguibacteroides_justesenii	0.000872919	0.0595652
Rhinocladiella_mackenziei_CBS_650.93	0.00087036	0.269502
Rhizophagus_irregularis	0.000865804	0.23574
Corynebacterium_efficiens	0.000858521	0.15113
Clostridium_sp._HMP27	0.000853931	0.287196
Sphingomonas_phyllosphaerae	0.000853316	0.0909964
Dermacoccus_sp._Ellin185	0.000850273	0.185107
Clostridium_ihumii	0.00084733	0.287758
Macrococcus_caseolyticus	0.0008465	0.169279
Quadrisphaera_sp._DSM_44207	0.00084596	0.197721
Corynebacterium_flavescens	0.000844474	0.187005
Hymenobacter_roseosalivarius	0.000844304	0.0610976
Ornithinimicrobium_sp._CNJ-824	0.000844077	0.194832
Clostridium_amylolyticum	0.000833218	0.198412
Cryptococcus	0.000832735	0.203716
Arthrobacter_sp._Soil782	0.000830426	0.281637
Paenibacillus_antibioticophila	0.000829865	0.363799
Sphingomonas_sp._Leaf17	0.000829123	0.195291
Pseudomonas_xanthomarina	0.000825597	0.236624
Kocuria_turfanensis	0.000824628	0.209551
Sphingomonas_sp._RIT328	0.000822578	0.0322134
Tissierella_sp._P1	0.00082068	0.298792
Streptococcus_salivarius	0.000816866	0.263473
Psychrobacter_sp._1501(2011)	0.000813727	0.275044
Desulfitobacterium_hafniense	0.00081207	0.335097
Methylobacterium_phyllostachyos	0.000811027	0.0941866
Bifiguratus_adelaidae	0.000810361	0.10263
Microdochium_bolleyi	0.000810332	0.145192
Piscicoccus_intestinalis	0.000809824	0.162293
Nigerium_massiliense	0.000807164	0.212516
Malassezia_sympodialis_ATCC_42132	0.000806165	0.132779
Paracoccus_sphaerophysae	0.000806065	0.414731
Kwoniella_dejecticola_CBS_10117	0.000802823	0.272252
Nostoc_sp._KVJ20	0.000801857	0.104634
Anaerosporobacter_mobilis_DSM_15930	0.000801768	0.222575
Psychromonas_sp._SP041	0.000799095	0.113048
Cloacibacterium_normanense	0.000798829	0.318784
Tessaracoccus_sp._ZS01	0.000797435	0.34756
Malassezia	0.000796411	0.0594077
Pseudomonas_chloritidismutans_AW-1	0.000794878	0.238255
Hymenobacter_sedentarius	0.000790233	0.229125
Nocardioides_sp._Soil774	0.000788444	0.196498
Marssonina_brunnea_f._sp._'multigermtubi'_MB_m1	0.000787718	0.199896
Phialocephala_scopiformis	0.000787125	0.127283
Cellulomonas_sp._KRMCY2	0.000783017	0.311726
Pseudomonas_sp._URHB0015	0.000782873	0.244231
Azospirillum	0.000782332	0.149419
Megamonas	0.000777708	0.242379
Endocarpon_pusillum_Z07020	0.000776698	0.162751
Mobilicoccus	0.000776539	0.241488
Pseudomonas_sp._Leaf129	0.000773539	0.287255
Azospirillum_sp._B2	0.000768776	0.0833209
Lactobacillus_curvatus	0.000760011	0.196974
Hydrogenoanaerobacterium_saccharovorans	0.00075952	0.302528
Basidiobolus_meristosporus_CBS_931.73	0.000756678	0.13228
Candida	0.00075575	0.231427
Spirosoma_linguale_DSM_74	0.000747234	0.146673
Acidiplasma_cupricumulans	0.00074514	0.124072
Pedobacter_sp._Leaf41	0.000745097	0.162088
Tissierella_praeacuta	0.000745041	0.167188
Corynebacteriaceae	0.000738259	0.228176
Cellulomonas_massiliensis	0.000728145	0.179111
Curtobacterium_sp._MMLR14_010	0.000725586	0.238031
Erwinia_gerundensis	0.000718559	0.156042
Clostridium_tunisiense	0.000714433	0.23485
Phormidesmis_priestleyi	0.000713092	0.21357
Cyanobacteria	0.000712221	0.141103
Kytococcus_sedentarius	0.000710264	0.245411
Hanseniaspora_uvarum_DSM_2768	0.000709682	0.0843642
Nakamurella_panacisegetis	0.000707427	0.252809
Siccationidurans_arizonensis	0.000706004	0.220829
Arenimonas_metalli	0.000701495	0.280634
Agrococcus_sp._Marseille-P2731	0.000699457	0.191547
Cladophialophora_immunda	0.000699167	0.0453392
Cenococcum_geophilum_1.58	0.000698694	0.213017
Hymenobacter_actinosclerus	0.000697517	0.24633
uncultured_Clostridium_sp.	0.000696683	0.173226
Aureobasidium_subglaciale_EXF-2481	0.000695911	0.0542288
Corynebacterium_tuberculostearicum	0.000693113	0.117862
Nostoc_punctiforme	0.000690508	0.164633
Sclerotinia_sclerotiorum_1980_UF-70	0.000688781	0.138883
Micrococcus_luteus	0.000687173	0.158558
Cladophialophora_yegresii_CBS_114405	0.000686594	0.08395
Weissella	0.000685357	0.280407
Prevotella_sp._oral_taxon_473	0.000684977	0.0608408
Desulfosporosinus_youngiae	0.00068494	0.43191
Pseudomonas_seleniipraecipitans	0.000679697	0.118971
Corynebacterium_ureicelerivorans	0.000678694	0.108221
Mycobacterium_leprae	0.000674969	0.182534
Variovorax	0.000674461	0.0612531
Clostridium_homopropionicum	0.000671803	0.332848
Agrococcus_lahaulensis	0.000669498	0.155935
Pseudomonas_chloritidismutans	0.000669083	0.24729
Chlamydia_abortus	0.000667956	0.0500391
Gammaproteobacteria_bacterium_2W06	0.000664441	0.0637368
Chlamydia	0.000663732	0.246034
Prevotella_copri	0.000659766	0.128457
Tetraselmis_indica	0.00065634	0.123453
Clohesyomyces_aquaticus	0.000654991	0.133169
Sphingomonas	0.000654762	0.141975
Fusarium	0.000654545	0.151437
Eurotiales	0.000654043	0.1372
Eurotiomycetidae	0.000651086	0.165428
Dietzia	0.000650897	0.133057
Clostridiales_bacterium_43-6	0.0006481	0.38704
Puccinia	0.000647192	0.0518151
Staphylococcus	0.000645076	0.145426
Dermacoccus_nishinomiyaensis	0.000644927	0.226671
Actinomyces_provencensis	0.000644511	0.176348
Hyphopichia_burtonii_NRRL_Y-1933	0.000644231	0.262727
Paracoccus_sediminis	0.000643643	0.238
Micromonosporaceae	0.000641771	0.19227
Elaphomyces_granulatus	0.000629497	0.112038
Glutamicibacter	0.000626317	0.17157
Pseudomonas_stutzeri_A1501	0.000622403	0.113997
Fusobacterium	0.000622294	0.141987
Melampsora_larici-populina_98AG31	0.000619782	0.134602
unclassified_Clostridiales	0.000619218	0.161473
Rhizophagus_irregularis_DAOM_181602=DAOM_197198	0.000617451	0.108874
Clostridiaceae	0.000613912	0.245989
Pseudonocardia	0.000613526	0.171213
Corynebacterium_sp._Marseille-P4122	0.000611783	0.27763
Streptococcus_dysgalactiae	0.00060898	0.132222
Pelosinus	0.000606929	0.211138
Aeromicrobium_choanae	0.000605596	0.146349
Sphingomonas_sp._Leaf339	0.00060537	0.110546
Hypholoma_sublateritium_FD-334_SS-4	0.000605364	0.182683
Azospirillum_humicireducens	0.000604367	0.137782
Rufibacter_ruber	0.000600797	0.199713
Hymenobacter_mucosus	0.000600329	0.0725596
Blastococcus	0.0005995	0.0948989
Robinsoniella	0.000599458	0.394256
Pseudomonas_balearica_DSM_6083	0.000598439	0.28353
Kytococcus	0.000598354	0.126025
Pestalotiopsis_fici_W106-1	0.000598131	0.115441
Azospirillum_brasilense	0.000597823	0.172267
Streptococcus_sp._GMD4S	0.000596446	0.140836
Herpotrichiellaceae	0.000594224	0.0518861
Exophiala_dermatitidis_NIH/UT8656	0.000593182	0.0937791
Leuconostoc_sp._DORA_2	0.000589919	0.184605
Psychrobacter_pasteurii	0.00058903	0.169591
Cellulosilyticum_sp._I15G10I2	0.000588894	0.234327
Actinoplanes	0.00058691	0.245318
Clostridium_argentinense	0.000586843	0.231269
Proteiniclasticum_ruminis	0.000583598	0.228545
Comamonadaceae_bacterium_CCH4-C5	0.000582461	0.262285
Cellulomonas_carbonis	0.000576466	0.162781
Moraxella_osloensis	0.00057521	0.212346
Pseudomonas_sp._ICMP_561	0.000571048	0.266715
uncultured_Mediterranean_phage_uvMED	0.000569818	0.19149
Chlamydomonas_reinhardtii	0.000569703	0.0802392
Sphingomonas_sp._1PNM-20	0.000567964	0.115158
Clostridium_cadaveris	0.000567308	0.304125
Acidipropionibacterium_acidipropionici	0.000561494	0.179903
Deinococcus_aquatilis	0.00055952	0.0806669
Blastococcus_sp._DSM_46786	0.000557778	0.119629
Plasmodium_ovale_wallikeri	0.000557329	0.0809005
Enterococcus_sp._RIT-PI-f	0.000556633	0.143897
Glutamicibacter_sp._BW77	0.000555808	0.231034
Fonsecaea_multimorphosa	0.000555504	0.0753875
Leuconostoc_citreum	0.000554696	0.180219
Mobilicoccus_massiliensis	0.000552478	0.196312
Kocuria	0.000552428	0.174969
Agaricales	0.000552351	0.114506
Clostridium_sp._Marseille-P2415	0.000552174	0.283217
Agrococcus_carbonis	0.000547766	0.102462
Lysinibacillus_boronitolerans	0.000547265	0.200194
Fonsecaea	0.000545594	0.170629
Clostridium_sp._USBA_49	0.000545146	0.292965
Anaerococcus	0.000544941	0.114768
Micrococcus	0.000543804	0.106294
Janibacter_sp._Soil728	0.000542789	0.146017
Propionibacterium_acnes_JCM_18920	0.000535779	0.184552
Pseudomonas_caspiana	0.000532887	0.271116
Neisseria_polysaccharea_ATCC_43768	0.000529356	0.16239
Enhydrobacter_sp._H5	0.000526338	0.169095
Sphingomonas_jaspsi	0.000524981	0.0742188
Taphrina_deformans_PYCC_5710	0.000524615	0.185721
Atlantibacter_hermannii_NBRC_105704	0.000524375	0.150949
Blastococcus_saxobsidens	0.000524072	0.144929
Candidatus_Solibacter_usitatus	0.000523326	0.11691
Rhizobium_leguminosarum	0.000522894	0.13088
Turicella_otitidis	0.00052274	0.186151
Altererythrobacter	0.00052177	0.0979182
Mycosphaerellaceae	0.000518259	0.119762
Corynebacterium_propinquum	0.000514622	0.126502
Glutamicibacter_halophytocola	0.000513486	0.222906
Frankia	0.000512772	0.204189
Setosphaeria_turcica_Et28A	0.000511913	0.109727
Fontibacillus_panacisegetis	0.000509693	0.0795516
Catenaria_anguillulae_PL171	0.000509091	0.116198
Cellulomonas_marina	0.000508511	0.14959
Weissella_cibaria	0.000503992	0.188606
Clostridium_intestinale	0.000501731	0.162345
Pyrenophora_teres_f._teres_0-1	0.000499706	0.0495726
Gemella_haemolysans	0.000499646	0.0852007
Sanguibacter_marinus	0.000497494	0.10103
Pseudoflavonifractor_sp._Marseille-P3106	0.000496431	0.168007
Corynebacterium_diphtheriae	0.000494201	0.069408
Roseomonas_gilardii	0.000493942	0.113843
Psychrobacter_piechaudii	0.00049112	0.124778
Gordonia_bronchialis	0.000488946	0.159626
Sphingomonas_sp._Leaf357	0.000488833	0.147307
Fusarium_sambucinum_species_complex	0.000486893	0.0510302
Penicillium	0.000485199	0.1549
BeAn_58058_virus	0.000484347	0.072769
Brevibacterium	0.000483103	0.0903137
Microbacterium_sp._AR7-10	0.000481531	0.176728
Lysinibacillus_fusiformis	0.000479188	0.154885
Piromyces_sp._E2	0.000479183	0.208144
Acinetobacter_harbinensis	0.000478173	0.0831944
Nocardioides_lianchengensis	0.00047752	0.137437
Anaerococcus_prevotii	0.000477048	0.136299
Peptoniphilus	0.000476186	0.0932781
Clostridium_botulinum	0.000475053	0.204727
Cutibacterium_granulosum	0.000474946	0.134523
Staphylococcus_epidermidis	0.000474907	0.134055
Ustilago	0.000474629	0.0789922
Sphingomonas_rubra	0.000471247	0.0156052
Exophiala_aquamarina_CBS_119918	0.000471011	0.120123
Flavobacterium_ummariense	0.000470731	0.045477
Anaerocolumna_jejuensis	0.000470725	0.282743
Nocardioides_alpinus	0.000470074	0.181401
Escherichia_coli_H605	0.000469674	0.125015
Ruminiclostridium	0.000467154	0.212086
Hassallia_byssoidea_VB512170	0.000465824	0.147174
Puccinia_sorghi	0.000465526	0.0355188
Rhodotorula_sp._JG-1b	0.000463926	0.0334268
Spirosoma	0.000463852	0.0929734
Agaricomycetidae	0.000461538	0.0789364
Cryptococcaceae	0.000460981	0.157615
Mycobacterium_tuberculosis	0.000460879	0.0945135
Veillonellaceae	0.000459324	0.0639486
Kineosphaera_limosa	0.0004589	0.136056
Rhizoclosmatium_globosum	0.000458755	0.0161284
Hymenobacter_sp._IS2118	0.000458212	0.11267
Sphingomonas_sp._S6-262	0.000458003	0.033184
Bradyrhizobium	0.000457857	0.029974
Hymenobacter_sp._MIMBbqt21	0.000457745	0.0564524
Paracoccus_sp._WN007	0.000457054	0.120975
Phaeomoniella_chlamydospora	0.000453988	0.0643103
Acidaminobacter_hydrogenoformans	0.000453559	0.224238
Pseudomonas	0.000452958	0.173068
Roseburia	0.000452951	0.0835484
Cladophialophora_psammophila_CBS_110553	0.000450964	0.104596
Corynebacterium_pseudogenitalium	0.000450574	0.105297
Myxosarcina_sp._GI1	0.000450257	0.0687505
Corynebacterium_afermentans	0.000446724	0.114758
Achromobacter_sp._Root565	0.000444043	0.144723
Acinetobacter_sp._HA	0.000443923	0.108313
Ornithinimicrobium_pekingense	0.000443297	0.260472
Acinetobacter_sp._ANC_4218	0.000441566	0.113988
Geodermatophilus_ruber	0.000440418	0.216392
Dietzia_alimentaria	0.00043843	0.166059
Ustilago_bromivora	0.000437044	0.150601
Tessaracoccus_flavescens	0.0004364	0.181197
Acetobacteraceae	0.000435388	0.0760054
Pseudomonas_stutzeri_DSM_4166	0.000434803	0.122075
Dermacoccus_sp._CCH2-D9	0.000433453	0.128527
Capronia_epimyces_CBS_606.96	0.000431508	0.162244
Plasmodium_vivax	0.000429069	0.12626
Pseudomonas_sp._S1E40	0.000424654	0.232382
Deinococcus_reticulitermitis	0.000423858	0.147814
Prevotella_copri_CAG:164	0.000422381	0.108173
Arthrobacter	0.000421937	0.0903043
Massilia_eurypsychrophila	0.000421841	0.256681
Variovorax_paradoxus	0.00042127	0.0351322
Dermacoccus_sp._PE3	0.000421142	0.175183
Marinilactibacillus	0.000418701	0.1432
Exophiala_spinifera	0.000413076	0.105356
Bipolaris_sorokiniana_ND90Pr	0.000412397	0.136747
Siccibacter_colletis	0.000412257	0.0881779
Bacillus_massiliosenegalensis	0.000409796	0.179863
Prevotella_bivia	0.000405279	0.120599
Rheinheimera_mesophila	0.000404543	0.210773
Methylobacterium_sp._Leaf125	0.000403079	0.184182
Arsenicicoccus_sp._oral_taxon_190	0.000400278	0.180573
Paenibacillus_sp._St-s	0.000397718	0.0915369
Pelosinus_sp._UFO1	0.000397606	0.181558
Achromobacter	0.000397227	0.116045
Kocuria_palustris	0.000397109	0.0554015
Acidovorax_temperans	0.000392615	0.209406
Alternaria_alternata	0.000391568	0.0810013
Acinetobacter_albensis	0.000390784	0.159277
Eukaryota	0.000390697	0.0729488
Symbiodinium_microadriaticum	0.000389451	0.0424923
Paenibacillus_etheri	0.00038859	0.189848
Geodermatophilus_sp._Leaf369	0.000387965	0.0581848
Limnobacter_sp._MED105	0.000386284	0.22662
Diaporthe_ampelina	0.000386026	0.0389061
Hungatella_hathewayi	0.000385502	0.187414
Paracoccus_sp._PAMC_22219	0.000384366	0.0735587
Gammaproteobacteria_bacterium_HGW-Gammaproteobacteria-9	0.000383639	0.0918944
Kwoniella_heveanensis	0.000380832	0.0794303
Pseudescherichia_vulneris_NBRC_102420	0.000380476	0.142939
Flavobacterium	0.000379962	0.100056
Bacillus_sp._FJAT-25496	0.000379909	0.0950413
Blastococcus_sp._DSM_44270	0.000378433	0.161298
fungal_sp._No.11243	0.000378205	0.111656
Planococcus_massiliensis	0.000376055	0.0545232
Coprococcus	0.000374941	0.0794046
Lachnotalea_glycerini	0.000373816	0.189042
Pseudomonas_sp._DR_5-09	0.000372952	0.171958
Sphingomonadales_bacterium_CG12_big_fil_rev_8_21_14_0_65_65_10	0.000372447	0.0573393
Coccomyxa_subellipsoidea_C-169	0.000371892	0.0905237
Planococcaceae	0.000370963	0.107722
Azospirillum_thiophilum	0.000369455	0.086015
uncultured_Clostridiales_bacterium	0.000368686	0.172832
Sphingomonas_sp._TZW2008	0.000368222	0.0777678
Rhizobacter_sp._Root404	0.000365339	0.212522
Diaporthe_helianthi	0.000365239	0.0825948
Exophiala_sideris	0.0003648	0.045497
Sphingomonas_astaxanthinifaciens	0.00036351	0.131599
Alishewanella	0.000361703	0.0962428
Achromobacter_sp._Root83	0.000361524	0.134573
Pseudomonas_graminis	0.000361204	0.15938
Paenibacillus_sp._FSL_H8-0548	0.000360996	0.0910842
Chlamydia_trachomatis	0.000359675	0.0583651
Bordetella	0.00035924	0.112091
Microbotryum	0.000357438	0.0773553
Lactobacillus_brevis	0.00035635	0.0861426
Desulfitobacterium	0.00035607	0.176986
Rufibacter_roseus	0.000354838	0.234267
Isoptericola_variabilis	0.000352758	0.0951616
Janibacter_hoylei	0.000351134	0.146646
Enhydrobacter_aerosaccus	0.000350266	0.132252
Batrachochytrium_dendrobatidis	0.000349381	0.0541815
Enterococcus_aquimarinus	0.000348503	0.155763
Solibacillus_isronensis	0.000347892	0.0919834
Sordariomycetes	0.000346424	0.0555611
Lysinibacillus_sp._LK3	0.000345699	0.106786
Pedobacter_hartonius	0.000345073	0.127647
Naematelia_encephala	0.000343645	0.0309548
Methylobacterium_mesophilicum	0.000342931	0.0398972
Cystobacter_fuscus	0.000341579	0.0673872
Phycomyces_blakesleeanus_NRRL_1555(-)	0.000341322	0.049563
Cupriavidus	0.000339991	0.205108
Pseudomonas_fragi	0.000339012	0.0532783
Microvirga_ossetica	0.000337837	0.131179
Mobilicoccus_pelagius_NBRC_104925	0.000336667	0.097575
Arthrobacter_sp._Leaf234	0.000335196	0.0373943
Chondrus_crispus	0.00033356	0.0707812
Ajellomycetaceae	0.000332514	0.0842109
Capronia_coronata_CBS_617.96	0.000331673	0.13806
Bacillus_toyonensis	0.000331672	0.151385
Paracoccus_contaminans	0.000329652	0.0777948
Clostridium_sp._12(A)	0.000325685	0.141375
Sphaerobolus_stellatus_SS14	0.000323976	0.0396605
uncultured_marine_thaumarchaeote_KM3_53_F08	0.000323519	0.0947738
Mortierella	0.000323283	0.0283054
Oscillibacter_ruminantium	0.000320814	0.115277
Modestobacter_sp._Leaf380	0.000320236	0.0931407
Parasitella_parasitica	0.00031977	0.0842154
Sphingomonas_endophytica	0.000319707	0.150875
Pedobacter_sp._BAL39	0.000319313	0.0370889
Pseudomonas_sp._BAY1663	0.000319114	0.0570329
Flavonifractor	0.000317541	0.183178
Flavobacterium_sasangense	0.000317076	0.138913
Chryseobacterium_treverense	0.000315331	0.15929
Staphylococcus_hominis	0.000314937	0.114505
Deinococcus	0.000313969	0.0800064
Paenibacillus_amylolyticus	0.000313465	0.045828
Glutamicibacter_sp._BW80	0.000313107	0.101561
Flavobacteriales_bacterium	0.000311996	0.0693819
Elizabethkingia	0.000311295	0.0861742
Psychrobacter	0.000310702	0.0609995
Chlamydia_psittaci	0.000310502	0.0886353
Plasmodiophora_brassicae	0.000310412	0.125447
Pedobacter_sp._Leaf216	0.000309182	0.111587
Stomatobaculum_longum	0.000305257	0.106675
Pedobacter_sp._R20-19	0.000303506	0.0636749
Pseudomonas_koreensis	0.00030331	0.181861
Deinococcus_apachensis	0.000302604	0.0624681
Hymenobacter_psychrophilus	0.000301991	0.0842308
Aspergillus_steynii_IBT_23096	0.000299798	0.0835694
Corynebacterium_aurimucosum	0.000299742	0.0939608
Moraxella_atlantae	0.000298726	0.0750584
Bacillus_sp._FJAT-29814	0.000298337	0.0763407
Bradyrhizobium_erythrophlei	0.00029487	0.0717148
Candidatus_Rickettsiella_isopodorum	0.000294108	0.22519
Achromobacter_sp._MFA1_R4	0.000291632	0.172848
Belnapia_sp._F-4-1	0.0002906	0.171758
Corynebacterium_sp._HMSC11E11	0.000288353	0.0662567
Psychrobacter_sp._Sarcosine-02u-2	0.000287536	0.0944303
Janibacter_indicus	0.000287332	0.055711
Terrisporobacter_glycolicus	0.000285966	0.0623222
Kocuria_rhizophila_DC2201	0.000285714	0.0710275
Knoellia_flava	0.00028366	0.130155
Enterospora_canceri	0.000283425	0.0181333
Ochrobactrum_sp._A44	0.00028152	0.0747743
Acanthamoeba_castellanii_str._Neff	0.000280983	0.0535471
Provencibacterium_massiliense	0.000280279	0.125869
Agaricomycetes	0.000279847	0.0395742
Pedobacter_jeongneungensis	0.000279811	0.10452
Streptomyces	0.00027889	0.0774505
Acidovorax_sp._CCH12-A4	0.000278777	0.146767
Pedobacter_insulae	0.000278438	0.0567193
Pseudoalteromonas	0.00027758	0.0774997
Caulobacter	0.00027534	0.0318816
Chryseobacterium_haifense	0.000274486	0.0488658
Erwinia_billingiae	0.000272156	0.051249
Rhynchosporium	0.000270762	0.0267644
Leuconostoc_pseudomesenteroides	0.000269742	0.0611347
Oscillibacter_valericigenes	0.000269651	0.145383
Nocardioides_sp._CF8	0.000269561	0.0550685
Duganella_sp._Leaf61	0.000269501	0.027125
Acinetobacter_sp._LCT-H3	0.000268619	0.176956
Pedobacter_sp._PACM_27299	0.000268594	0.0702658
Clostridium_beijerinckii	0.000268504	0.130683
Dietzia_timorensis	0.000268399	0.0517646
Sphaerulina_musiva_SO2202	0.000266949	0.0739458
Cellvibrio	0.000266747	0.0891717
Nocardioides	0.000266684	0.0999951
Actinobacteria	0.000266356	0.0789441
Streptococcus_mitis	0.000265205	0.0474071
Prevotellaceae_bacterium_Marseille-P2826	0.000264463	0.0369189
Rhizobium_marinum	0.000264132	0.114072
Plasmopara_halstedii	0.000263896	0.0861144
Spirosoma_rigui	0.000263816	0.0705223
Nadsonia_fulvescens_var._elongata_DSM_6958	0.000263158	0.0955735
Lachnoclostridium	0.000262251	0.0750665
Sphingomonas_sp._Leaf20	0.000260113	0.0183059
Colletotrichum	0.000259815	0.0780217
Peptostreptococcaceae	0.00025952	0.107011
Corynebacterium_vitaeruminis	0.000258734	0.0579232
Oidiodendron_maius_Zn	0.000257806	0.078518
Serinicoccus_profundi	0.000256283	0.153714
Pantoea_sp._Sc1	0.000254578	0.117568
Hymenobacter_sp._DG25B	0.000254331	0.059553
Anaerotignum_neopropionicum	0.000253846	0.0898915
Propionibacterium_acnes_JCM_18916	0.000251088	0.0629641
Actinoplanes_friuliensis	0.000249126	0.10454
Ascosphaera_apis_ARSEF_7405	0.000248747	0.0279612
Auraticoccus_monumenti	0.000248485	0.0218828
Plantibacter	0.000245655	0.146401
Albugo_laibachii_Nc14	0.000244436	0.0477562
Weissella_koreensis	0.000244405	0.0748669
Chrysochromulina_sp._CCMP291	0.000244137	0.0509301
Stenotrophomonas_sp._LM091	0.000243788	0.0864477
Kytococcus_aerolatus	0.000242579	0.0565787
Sphingobacterium_sp._CFCC_11742	0.00024162	0.0365758
Paracoccus_yeei	0.000241582	0.109047
Clostridioides_difficile	0.000240794	0.063233
Microbacterium_sp._SCN_70-27	0.00023922	0.0826541
Novosphingobium_sp._AP12	0.000238381	0.0346734
Dyadobacter	0.000237529	0.128049
Paracoccus_alkenifer	0.000237289	0.0652116
Ochrobactrum	0.000236936	0.0476459
Hymenobacter_terrenus	0.000235684	0.112157
Microcoleus_sp._PCC_7113	0.000235079	0.0371168
Nocardioides_sp._Root122	0.000234849	0.0579693
Enhydrobacter_aerosaccus_SK60	0.00023484	0.0599421
Pseudomonas_sp._R62	0.000231869	0.0683074
Fibrella_sp._ES10-3-2-2	0.00023162	0.0558902
Pseudomonas_sp._Choline-3u-10	0.000231173	0.0999447
Flavobacteriia	0.000230663	0.112724
Tilletiaria_anomala_UBC_951	0.000230593	0.0683735
Rouxiella_chamberiensis	0.000229504	0.0516305
Lysinibacillus_sp._FJAT-14222	0.000228728	0.0680798
Kocuria_kristinae	0.000228124	0.081887
Desemzia_incerta	0.000226857	0.0794012
Bacillus_sp._FJAT-29937	0.000226598	0.145946
Burkholderiaceae	0.000224368	0.229024
Brachybacterium_muris	0.000224323	0.104193
Corynebacterium_terpenotabidum	0.000224319	0.0930141
Azospirillum_lipoferum	0.000223321	0.0932878
Dermacoccaceae	0.000222718	0.0873667
Psychrobacter_aquaticus	0.000222355	0.108377
Bacilli	0.000221577	0.137033
Pseudomonas_sp._MT-1	0.00022142	0.149257
Microbacterium_sp._Root53	0.000220533	0.0574492
Psychromonas_arctica	0.000219979	0.113994
Pseudomonas_sp._W15Feb9B	0.000218013	0.106197
Acinetobacter_baumannii	0.000215694	0.0684868
Eubacterium_sp._CAG:202	0.000214544	0.120585
Pseudomonas_granadensis	0.000213991	0.068318
Firmicutes_bacterium_HGW-Firmicutes-16	0.000213001	0.064897
Pseudomonas_kunmingensis	0.000212732	0.177732
Corynebacteriales	0.000211449	0.0814465
Altererythrobacter_sp._66-12	0.000210909	0.0711486
Bradyrhizobium_lablabi	0.000210202	0.0567251
Stenotrophomonas_humi	0.000210164	0.0872397
Brachybacterium_sp._sponge	0.000209352	0.0500682
Pseudomonas_sp._Irchel_3A5	0.000208387	0.109823
Psychrobacter_sp._PRwf-1	0.000206586	0.0575015
alpha_proteobacterium_L41A	0.000206259	0.0408272
Bacillus_dakarensis	0.000206171	0.0427091
Pantoea_calida	0.000203056	0.0687555
Streptococcaceae	0.000201404	0.035197
Peronosporales	0.000201351	0.0338387
Vitrella_brassicaformis_CCMP3155	0.000200956	0.0511909
Aspergillus_rambellii	0.000199667	0.0705913
Comamonadaceae_bacterium_CCH12-A10	0.000197832	0.0221946
Cellulomonas_sp._PSBB021	0.000196302	0.119227
Flaviflexus_massiliensis	0.000194896	0.0917666
Candidatus_Paraburkholderia_calva	0.00019469	0.0366667
Chryseobacterium_sp._FF12	0.000193547	0.113292
Tilletia	0.00019328	0.0771133
Nocardioides_sp._Soil805	0.000191316	0.0671722
Nocardioides_szechwanensis	0.00019113	0.0380658
Pseudomonas_sp._02C_26	0.000190565	0.0757581
Paludifilum_halophilum	0.000190326	0.106994
Mycobacterium_abscessus_subsp._bolletii	0.000190009	0.0558891
Acinetobacter_sp._ANC_5324	0.000189985	0.0630883
Polytolypa_hystricis_UAMH7299	0.000189655	0.0529857
Paenibacillus_phocaensis	0.000189115	0.141084
Staphylococcus_sciuri	0.000189065	0.0472524
Cellulomonas_sp._A375-1	0.000188733	0.0421062
Pseudoclavibacter_faecalis	0.000188629	0.0567663
Hymenobacteraceae	0.000188011	0.0836131
Microbacterium_profundi	0.000187879	0.0341682
Pseudomonas_sp._BRH_c35	0.000187291	0.104416
Pasteurellaceae	0.000185718	0.0216458
Pseudovibrio_sp._Ad14	0.000185233	0.0975091
Phytophthora_megakarya	0.000184523	0.0787204
Acinetobacter_johnsonii	0.000183671	0.0380258
Stenotrophomonas_maltophilia_MF89	0.000182908	0.110342
Pseudomonas_sp._GM30	0.000181204	0.101823
Ascochyta_rabiei	0.000180876	0.0647339
Fusobacterium_periodonticum	0.000180844	0.0660927
Microlunatus_phosphovorus	0.000180471	0.0817886
Nocardioides_sp._URHA0032	0.000180263	0.0395371
Frigoribacterium_sp._Leaf164	0.000179057	0.0909309
Acinetobacter_schindleri	0.000176683	0.0485441
Pedobacter_steynii	0.00017657	0.0660316
Reticulomyxa_filosa	0.000175364	0.043127
Pseudorhodoferax_sp._Leaf267	0.000174981	0.0396135
Pseudomonas_syringae_group_genomosp._3	0.000174943	0.116023
Haemophilus	0.000174929	0.0631635
Sphingobacterium_sp._IITKGP-BTPF85	0.000174922	0.0803709
Leptotrichia	0.000174913	0.0416611
Acinetobacter_sp._CIP_101934	0.000174876	0.0767538
Nocardioides_sp._Soil777	0.000174368	0.0486043
Lactobacillus_brevis_ATCC_14869_=_DSM_20054	0.000174235	0.0504485
uncultured_marine_group_II/III_euryarchaeote_KM3_87_G01	0.000173884	0.0708011
Agrococcus_baldri	0.000173834	0.105575
Jeotgalibaca_dankookensis	0.000173166	0.049559
Lactococcus	0.000172283	0.07325
Stenotrophomonas_maltophilia_RA8	0.000170649	0.119163
Monosiga_brevicollis_MX1	0.000169492	0.033983
Kocuria_sp._CNJ-770	0.00016648	0.058586
Streptococcus_oralis	0.000165679	0.0577745
Pedobacter_borealis	0.000165597	0.0375195
Cronobacter_sakazakii	0.000165084	0.0951308
Sphingomonas_sp._Mn802worker	0.000164426	0.0463005
Brachybacterium_sp._HMSC06H03	0.000164371	0.0444565
Buchnera_aphidicola	0.00016412	0.028619
Deinococcus_swuensis	0.000162631	0.0556503
Rhizobium_sp._Leaf321	0.000162246	0.0518374
Meyerozyma_guilliermondii_ATCC_6260	0.00016223	0.0430753
Lysinibacillus_sphaericus	0.000160556	0.0645283
Brevibacterium_mcbrellneri	0.000160474	0.0414636
Bacillus_methanolicus	0.000160447	0.0536132
Sclerotiniaceae	0.000160281	0.103132
Leptotrichia_wadei	0.00015918	0.0509905
Staphylococcus_aureus	0.000159045	0.0623904
Massilia_timonae	0.000158808	0.0693149
Flavobacteriaceae_bacterium_3519-10	0.00015849	0.0509661
Anaerovorax_odorimutans	0.000158419	0.112475
Variovorax_sp._CF079	0.000157919	0.123367
Pseudomonas_fluorescens_group	0.000157917	0.0545569
Caulobacterales_bacterium_RIFCSPHIGHO2_01_FULL_70_19	0.000157895	0.0335641
Guillardia_theta_CCMP2712	0.000157846	0.0351681
Melittangium_boletus	0.000157044	0.0512441
Chryseobacterium_gregarium	0.00015538	0.0594878
Dysgonomonas_capnocytophagoides	0.000155002	0.0524619
Rozella_allomycis_CSF55	0.000154079	0.0350123
Cellulomonas_sp._73-92	0.000149974	0.0815925
Altererythrobacter_dongtanensis	0.000146789	0.0328958
Brachybacterium_sp._P6-10-X1	0.000146465	0.0685236
Pyrenochaeta_sp._DS3sAY3a	0.000145791	0.0326864
Anaerococcus_hydrogenalis	0.000144292	0.0584098
Saccharopolyspora_rectivirgula	0.000143916	0.035219
Massilia_sp._KIM	0.000143631	0.0429346
Pseudomonas_caeni	0.000143561	0.0825228
Candidimonas_nitroreducens	0.000143183	0.0914681
Pseudomonas_chlororaphis	0.000142681	0.0860993
Sphingomonas_sanguinis	0.000142348	0.0532152
Paracoccus	0.000142266	0.0504644
Microcoleus_vaginatus	0.000141962	0.0342256
Flavobacterium_sp._Root935	0.000139679	0.0546536
Coniochaeta_ligniaria_NRRL_30616	0.000138389	0.0272889
Cnuella_takakiae	0.000137817	0.0943697
Duganella_sp._Leaf126	0.000137519	0.0635371
Bacillus_azotoformans	0.000137283	0.106536
Pedobacter_suwonensis	0.000135871	0.0561196
Corynebacterium_matruchotii	0.000135679	0.0605393
Stenotrophomonas	0.000135567	0.0887151
Lactobacillus	0.000135256	0.0869704
Achromatium_sp._WMS1	0.000134992	0.0666582
Novosphingobium_kunmingense	0.000132801	0.0355735
Clostridium_sp._CL-6	0.000130165	0.0612328
Yersiniaceae_bacterium_2016Iso4	0.000129381	0.0227033
Timonella_senegalensis	0.000128842	0.038579
Xanthomonadaceae_bacterium_NML93-0399	0.000127496	0.0544671
Terrabacteria_group	0.000125563	0.0904695
Corynebacterium_lipophiloflavum	0.000125392	0.0353435
Exiguobacterium	0.000125074	0.0717135
Methylobacterium_sp._CCH5-D2	0.000125	0.0391218
Flavobacterium_johnsoniae	0.000124526	0.024342
Paenibacillus_rubinfantis	0.000123995	0.0957768
Sphingomonas_paucimobilis	0.000123603	0.0299523
Jaapia_argillacea_MUCL_33604	0.000123514	0.0171905
Saprolegniaceae	0.000122807	0.0114627
Clostridium_nigeriense	0.00012277	0.0574775
Citrobacter_freundii	0.000122721	0.0284637
Pseudomonas_oleovorans	0.000122219	0.0631406
Nectria_haematococca_mpVI_77-13-4	0.000121762	0.0272369
Rhizobium_sp._NFR07	0.00012126	0.0371031
Bacillus_horneckiae	0.000121226	0.141206
Deinococcus_wulumuqiensis	0.000120919	0.157094
Actinomyces	0.00012068	0.059214
Escherichia_coli	0.00012038	0.0376038
Paramecium_tetraurelia	0.000120151	0.0403035
Kocuria_sp._WRN011	0.000119055	0.103956
Listeria_monocytogenes	0.000118257	0.0363333
Sphingomonas_sp._OV641	0.000116141	0.0625151
Basidiomycota	0.000115702	0.0210406
Bacillus_persicus	0.000114142	0.0744508
Enterococcus_asini	0.00011362	0.0369129
Achromobacter_sp._Root170	0.000111269	0.0742683
Deinococcus_phoenicis	0.000108709	0.0333626
Clostridium_sp._CAG:138	0.000108626	0.0470705
Bacillus_sp._FJAT-27986	0.000108534	0.0412819
Faecalibacterium_prausnitzii	0.000108253	0.0544251
Hymenobacter_aerophilus	0.000108003	0.0161712
Duganella_sp._CF517	0.000107837	0.0402948
Rasamsonia_emersonii_CBS_393.64	0.00010774	0.0539792
Oxalobacteraceae_bacterium_AB_14	0.000107722	0.0348315
Caulobacterales_bacterium_RIFOXYB1_FULL_67_16	0.000107378	0.0834482
Oscillibacter	0.000107143	0.0116842
Pseudomonas_protegens	0.000107065	0.117933
Pseudomonadaceae	0.000106527	0.0395861
Leuconostoc_lactis	0.000106195	0.0700473
Flavobacterium_sp._Fl	0.000106195	0.0459782
unclassified_Bacteroidetes_(miscellaneous)	0.000105263	0.0126073
Pseudomonas_sp._MRSN12121	0.000105088	0.130008
Massilia_yuzhufengensis	0.000104984	0.0346211
Azospirillum_brasilense_Sp245	0.000104348	0.0547195
Sphingomonas_sp._Sph1(2015)	0.000104348	0.00386207
Sphingobacteriaceae_bacterium_GW460-11-11-14-LB5	0.000104221	0.0446376
Acinetobacter_sp._LoGeW2-3	0.000104211	0.0250262
uncultured_Stenotrophomonas_sp.	0.000104195	0.0604651
Pseudomonas_floridensis	0.000103538	0.113218
Ceraceosorus_bombacis	0.000103343	0.0398101
Sphingomonas_sp._JS21-1	0.000102564	0.0201237
Lautropia_mirabilis	0.000102348	0.0560434
Pseudomonas_sp._10B238	0.000101552	0.0225333
Listeria	0.000101125	0.0658064
Collinsella	0.0001	0.0103241
Arthrobacter_sp._EpRS66	9.91826e-05	0.0265667
Rhizobium_sp._LC145	9.45103e-05	0.0514395
Neomicrococcus_aestuarii	9.32587e-05	0.093228
Vibrio_rumoiensis	9.1997e-05	0.0801769
Flavobacteriales	9.18155e-05	0.0557772
Sphingomonas_jeddahensis	9.15445e-05	0.095337
Comamonas_sp._26	9.11418e-05	0.0630897
Pucciniomycotina	8.99465e-05	0.0205905
Pantoea_sp._A4	8.86932e-05	0.0403703
Veillonella_sp._oral_taxon_780	8.84956e-05	0.0375004
Pedobacter_sp._BMA	8.83876e-05	0.0328268
Alkanindiges	8.69517e-05	0.0415805
Massilia_alkalitolerans	8.66986e-05	0.0958336
Flavobacterium_reichenbachii	8.61801e-05	0.0573564
Mesorhizobium	8.58776e-05	0.0406965
Flavisolibacter_tropicus	8.4912e-05	0.0163291
Purpureocillium_lilacinum	8.47588e-05	0.0266964
Acinetobacter_kookii	8.43161e-05	0.0257101
Anaerococcus_octavius	8.4139e-05	0.0503397
Amaricoccus_sp._HAR-UPW-R2A-40	8.27388e-05	0.103583
Gardnerella_vaginalis	7.83958e-05	0.0902307
Pantoea_septica	7.61905e-05	0.0335965
Pantoea_rwandensis	7.41476e-05	0.0138582
Pseudoxanthomonas_dokdonensis	7.34277e-05	0.0410376
Pseudomonas_sp._HCC.1	7.34069e-05	0.0208015
Clostridium_sp._W14A	7.32229e-05	0.0597794
Peptoniphilaceae	7.22446e-05	0.0412361
Rhizobium_sp._ACO-34A	7.21425e-05	0.119756
Pseudomonas_sp._GM80	7.21191e-05	0.0541753
Prevotella_sp._oral_taxon_299	7.17944e-05	0.0224848
Kurthia_sp._11kri321	7.17889e-05	0.055776
Flavobacterium_sp._ACN2	7.17767e-05	0.0718787
Acinetobacter_phage_SH-Ab_15497	7.16395e-05	0.0500354
Enterobacter_hormaechei_ATCC_49162	7.09627e-05	0.0286059
Streptococcus_pneumoniae	7.0754e-05	0.075321
Aeromicrobium	7.04992e-05	0.0209194
Veillonella_sp._DNF00869	7.01042e-05	0.0314381
Micrococcales	6.97256e-05	0.0504731
Rhodobacteraceae	6.90951e-05	0.157976
Enterococcus	6.89655e-05	0.0175302
Enterobacterales	6.89655e-05	0.0303225
Corynebacterium_ammoniagenes	6.86032e-05	0.019627
Stenotrophomonas_sp._SC-N050	6.85185e-05	0.0266074
Stenotrophomonas_sp._14-69-23	6.78161e-05	0.0239619
Cellulomonas_flavigena	6.78015e-05	0.0238727
Achromobacter_insolitus	6.77735e-05	0.0356532
Micrococcaceae	6.68794e-05	0.0529015
Pedobacter_soli	6.65689e-05	0.0196928
Pedobacter_sp._ok626	6.4883e-05	0.0140556
Pseudomonas_sp._RIT-PI-r	6.27734e-05	0.0594644
Buttiauxella_noackiae	5.77353e-05	0.107668
Altererythrobacter_marensis	5.76041e-05	0.0522242
Salmonella_enterica	5.65302e-05	0.0432998
Pseudomonas_sp._URIL14HWK12:I6	5.56591e-05	0.0874372
Achromobacter_sp._NFACC18-2	5.55123e-05	0.0698515
Clostridium_sp._ASBs410	5.53284e-05	0.0219944
Rhizobium_sp._YR519	5.48808e-05	0.0245077
Stenotrophomonas_daejeonensis	5.48558e-05	0.0465673
Microbacterium_sp._TNHR37B	5.47431e-05	0.0133333
Faecalibacterium	5.45282e-05	0.0316069
Colletotrichum_fioriniae_PJ7	5.44274e-05	0.0705088
Proteobacteria	5.40541e-05	0.0101111
Verruconis_gallopava	5.39818e-05	0.0242143
Actinomyces_massiliensis	5.3977e-05	0.0535821
Metarhizium_album_ARSEF_1941	5.39075e-05	0.00740171
Enterococcus_casseliflavus	5.3146e-05	0.0526944
Pseudoxanthomonas_wuyuanensis	5.30369e-05	0.0820911
Chryseobacterium_bovis	5.29208e-05	0.0315631
Flavobacterium_sp._ACN6	5.26071e-05	0.0717311
Enterobacter_asburiae	5.23798e-05	0.0518519
Massilia_sp._Leaf139	5.23798e-05	0.0306032
Eutypa_lata_UCREL1	5.21739e-05	0.0172407
Pythium_insidiosum	5.19134e-05	0.0282722
Pseudomonas_sp._GM84	5.17416e-05	0.0259817
Cellulomonas_sp._HZM	5.09965e-05	0.0639194
Coprinopsis_cinerea_okayama7#130	5.08475e-05	0.0177847
Acinetobacter_sp._SFC	5.08334e-05	0.0403344
Chryseobacterium_sp._Leaf201	4.96109e-05	0.0580718
Sphingomonas_sp._28-66-16	4.86515e-05	0.017974
Pantoea_sp._OV426	4.23793e-05	0.0319283
Sphingobacterium	3.71553e-05	0.038425
Achromobacter_sp._KAs_3-5	3.68525e-05	0.0454597
Bordetella_bronchiseptica_980-2	3.62354e-05	0.025302
Chlamydomonas_eustigma	3.61998e-05	0.0325318
Siphoviridae	3.60624e-05	0.0195333
Pedobacter	3.6036e-05	0.00695789
Chryseobacterium_sp._YR460	3.56905e-05	0.0332702
Pedobacter_ginsenosidimutans	3.56084e-05	0.0733613
Buttiauxella_brennerae	3.54677e-05	0.0295385
Rhodococcus_hoagii	3.52484e-05	0.0151179
Magnaporthe_oryzae	3.50877e-05	0.015098
Methylobacterium	3.50877e-05	0.0191636
Pantoea_vagans_C9-1	3.49405e-05	0.0271157
Clostridioides_mangenotii	3.48164e-05	0.0485953
Macrococcus_sp._CCM_7927	3.47826e-05	0.0106111
Paramicrosporidium_saccamoebae	3.46328e-05	0.0284864
Flavobacterium_sp._Root901	3.44115e-05	0.030668
Pantoea_cypripedii	3.43405e-05	0.017981
Asanoa	3.42506e-05	0.0228869
Enterobacter_cloacae_complex	3.4188e-05	0.0119111
Achromobacter_sp._RTa	3.4188e-05	0.03639
Cellvibrio_sp._OA-2007	3.38983e-05	0.0132095
Pseudomonas_sp._Choline-02u-1	3.33356e-05	0.0594201
Sphingomonas_melonis	3.32093e-05	0.0237058
Agrobacterium_rhizogenes	3.22581e-05	0.0125714
Cyanidioschyzon_merolae_strain_10D	1.90476e-05	0.0151333
Sphingomonas_sp._Leaf25	1.88679e-05	0.00666667
Duganella	1.88124e-05	0.0130036
Lobosporangium_transversale	1.86916e-05	0.034807
Francisella_tularensis_subsp._holarctica	1.85185e-05	0.00565714
Alloiococcus_otitis	1.85185e-05	0.00994978
Xanthomonas_citri_pv._mangiferaeindicae	1.83486e-05	0.0263124
Caulobacteraceae	1.8018e-05	0.0137778
Bartonella_apis	1.8018e-05	0.00533333
Pyrenophora_tritici-repentis_Pt-1C-BFP	1.79538e-05	0.0460076
Novosphingobium_lentum	1.75439e-05	0.00542857
Stylonychia_lemnae	1.75439e-05	0.00833333
Tatumella_sp._OPLPL6	1.73913e-05	0.0314941
Burkholderiales	1.70509e-05	0.0307365
Bacteria	1.70456e-05	0.0422974
Actinobacteria_bacterium	1.69492e-05	0.0142667
Novosphingobium	1.68067e-05	0.00774118
Acinetobacter_calcoaceticus/baumannii_complex	1.48507e-05	0.0779256
Solirubrobacter_soli	1.4402e-05	0.0163077
Acidovorax	3.04762e-06	0.0132444
Xanthomonadaceae_bacterium_SCN_69-48	2.12508e-06	0.0295739
Variovorax_sp._WDL1	1.92166e-06	0.0087
Aureococcus_anophagefferens	1.23942e-06	0.0318548
Tremella_mesenterica_DSM_1558	9.97862e-07	0.0236582
Porphyromonadaceae	9.74659e-07	0.0313243
Pseudomonas_sp._NBRC_111117	6.73571e-07	0.0439324
Stenotrophomonas_maltophilia_Ab55555	1.638e-07	0.00866667
Amanita_muscaria_Koide_BX008	0	0
Campylobacter_rectus	0	0.0123429
Prevotellaceae	0	0.00342857
Psychromonas	0	0
Porphyrobacter_mercurialis	0	0
Bacillus_anthracis	0	0.017971
Hymenobacter_sp._CRA2	0	0.00365714
Conexibacter_woesei	0	0.00661905
Xylophilus_ampelinus	0	0.00581818
Clostridiales_bacterium_PH28_bin88	0	0.0101733
Bradyrhizobium_valentinum	0	0
Pseudopedobacter_saltans	0	0.00333333
Corynebacterium_pollutisoli	0	0.0175
Nakamurella_multipartita	0	0
Pseudoxanthomonas_spadix	0	0.0129524
Oxalobacteraceae	0	0.002
Cladophialophora_bantiana	0	0.0102
Pseudomonas_azotifigens	-1.56498e-06	0.0303289
Sanguibacter_soli	-1.88899e-06	0.0223113
Malassezia_globosa_CBS_7966	-1.95108e-06	0.0284234
Pseudomonas_sp._NFACC02	-5.582e-06	0.0694586
Stenotrophomonas_rhizophila	-1.57895e-05	0.0189154
Bacillus	-1.62382e-05	0.0541269
Nesterenkonia_jeotgali	-1.65514e-05	0.0351665
Enterobacter_timonensis	-1.67836e-05	0.022183
Sphingomonas_sp._Leaf231	-1.69492e-05	0.0170399
Enterococcus_faecium	-1.71306e-05	0.0428713
cellular_organisms	-1.71958e-05	0.0484387
Parabacteroides	-1.73913e-05	0.00521905
Staphylococcus_saprophyticus	-1.80239e-05	0.0226095
Cellulomonas_fimi	-1.83456e-05	0.0219378
Pseudomonas_gingeri	-1.89365e-05	0.033666
Intrasporangiaceae	-2.08483e-05	0.0353285
Dysgonomonas_sp._BGC7	-3.43861e-05	0.0177821
Streptococcus_pyogenes	-3.48038e-05	0.0227284
Bacillus_paralicheniformis	-3.48063e-05	0.0303192
Mucorales	-3.50877e-05	0.006
Porphyra_umbilicalis	-3.57599e-05	0.0147111
Pseudomonas_saudimassiliensis	-3.6036e-05	0.0158201
Bacillus_marisflavi	-3.68443e-05	0.0974081
Wickerhamomyces_anomalus_NRRL_Y-366-8	-5.29982e-05	0.0421299
Clostridium_sp._DL-VIII	-5.49248e-05	0.0271012
Acinetobacter_sp._ANC_3903	-8.80548e-05	0.0284258
